# Supplementary material
Source: publisher figshare collection journal article supplement (https://gsajournals.figshare.com/ndownloader/files/21677022)
Supplement: Supplementary file 1 [file 21677022]

**Supplemental Figure 1. Histogram of the levels of (square root) 25-hydroxyvitamin D and outliers in maternal (A) and neonatal (B) datasets**. A threshold of 3.5SD from the mean and 3 SD from the mean has been applied to exclude 2 extreme values from maternal and 3 from neonatal data, resepectively.

**Supplemental Figure 2. Array-genotyped maternal and fetal PC1 and PC2 and median values for each cluster**. Each dot shows the PC1-PC2 coordinates for mothers (in purple) and for neonates (in green). The correlation coefficient between maternal and fetal PC1 is ρ=0.93 and the correlation coefficient between maternal and fetal PC2 is ρ=0.95 (*Spearman's test p<0.05*). For each mother and neonate pair, the Euclidean distance between each maternal and fetal dot was assessed. Based on the distance, most mother-neonate pairs are within the same ancestry, high distant pairs suggest a separate maternal and paternal ancestry [min=0.00015, max=0.09; 3rd quartile=0.02, median=0.006, mean=0.014]. The median values for each principal component (1-10 PCs) were estimated for four groups: Hispanic (**HIS**), non-Hispanic Caucasian (**CAU**), East Asian (**EA**), African American and Other/Unknown (**AA**), from the array-genotyped individuals in each ancestry-specific cluster. Four ancestry-specific median coordinates for PC1-PC2 are plotted.

A

B

C

D

E

F

G

H

I

J

K

L

M

N

**Supplemental Figure 3. Linkage disequilibrium regional genomic plots of suggestively associated (*P*<5x10-6) loci with levels of 25-hydroxyvitamin D. (A-C)** Maternal loci, rs4149056 in *SLCO1B1,* rs11528045 near *HTR7* and rs6486205 near *CYP2R1,* suggestively associated with maternal vitamin D**;**  **(D)** Fetal rs11690195 between *MMADHC* and *RND3***,** suggestivelyassociated with neonatal vitamin D; **(E-K)** Maternal SNPs, rs9527875 between *DIAPH3* and *PCDH17*, rs72650824 between *CXCL8/IL-8* and *CXCL6*, rs2541497 in *TEKT5*, rs1550598 in *DOK6*, rs490379 near *PKN2*, rs7837124 near *C8ORF34* and rs20576 in *LINC00513 and* near *MKLN1*, suggestively associated with neonatal vitamin D; **(L-N)** Fetalrs17666424, rs2336664 and rs7015627 suggestively associated near *ACKR1, TMEM110 (STIMATE)*, and *MED30,* respectively. Each dot represents one SNP in the genomic region based on linkage disequilibrium with the top hit (*r2* in the range [0-1]).The X-axis represents the genomic position; the Y-axis shows the negative logarithm of the observed association *P*-value for each tested SNP. Plotted with the LocusZoom tool (Pruim *et al*. 2010)

**Supplemental Figure 4. Interaction between ID outcome, maternal rs490379 and neonatal 25-hydroxyvitamin D** **levels.** TheY-axis reports the medians and interquartile ranges for the levels of transformed neonatal 25-hydroxyvitamin D levels. The X-axis reports rs490379 (minor allele C MAF=0.12) AA, CA and CC maternal genotype categories for 349 controls (**GP**) and 179 intellectual disability cases (**ID**). Controls are shown in gold, ID cases in red.
